# Supplementary material
Source: PubMed Central journal article supplement (PMC4000834)
Supplement: 1318261111_pnas.201318261SI.pdf [file 1318261111_pnas.201318261SI.pdf]

# Supporting Information

Gómez et al. 10.1073/pnas.1318261111

## SI Results and Discussion

The Sonority Sequencing Principle (SSP) states that *blif* is preferred to *lbif*, but the same conclusion is not valid for *oblif* and *olbif* despite the similarity of the two contrasts at a phonetic level. Crucially, the presence of the vowel at the beginning allows for *olbif* to be syllabified as *ol.bif*, taking the consonant cluster out of the domain of the SSP.

Experiment 1 found that oxyhemoglobin changes differ significantly between syllables with sonority rises and syllables with sonority falls in the left temporal-perisylvian and the right

frontoparietal cortex. Experiment S1 investigated whether a similar pattern of neural activity holds for bisyllabic VCCVC words that presented a sonority rise or a sonority fall in their consonant cluster. We observed no significant differences between the syllable types in oxyhemoglobin concentration changes (all uncorrected *P* values >0.29, see Table S2). Deoxyhemoglobin differed significantly in the left frontoparietal region of interest [ $t(21) = -2.12$ ,  $P = 0.046$ ], although this result was no significant after applying the Holm-Bonferroni correction.

**Table S1. Lists of words presented to newborns in Experiments 1 (monosyllabic rises vs. falls), 2 (monosyllabic rises vs. plateaus), and S1 (bisyllabic rises vs. falls)**

| Monosyllables  |                   |                | Bisyllables    |                |
|----------------|-------------------|----------------|----------------|----------------|
| Sonority rises | Sonority plateaus | Sonority falls | Sonority rises | Sonority falls |
| pras           | bkin              | rvug           | oblif          | arbom          |
| fros           | dkan              | rvem           | ivros          | ilvan          |
| vlug           | gdif              | lbug           | adrif          | urpas          |
| vlin           | kdom              | rveg           | udros          | arvud          |
| brud           | kvas              | rdos           | iflud          | olbif          |
| vros           | kvif              | rfug           | uprif          | olvud          |
| from           | fkom              | lvug           | oflug          | urdos          |
| bran           | pan               | lbif           | afrom          | irvug          |

**Table S2. Statistics for all three experiments and regions of interest, including uncorrected and corrected *P* values and both oxyhemoglobin and deoxyhemoglobin**

| Region of interest              | Effect size (Cohen's <i>d</i> ) | <i>t</i> statistic | Uncorrected <i>P</i> value | Corrected <i>P</i> value |
|---------------------------------|---------------------------------|--------------------|----------------------------|--------------------------|
| Experiment 1 (oxyhemoglobin)    |                                 |                    |                            |                          |
| Left superior                   | 0.283                           | $t(18) = 1.23$     | 0.233                      | —                        |
| Left inferior                   | 0.563                           | $t(22) = 2.70$     | 0.013                      | 0.039*                   |
| Right superior                  | 0.632                           | $t(21) = 2.97$     | 0.007                      | 0.028*                   |
| Right inferior                  | 0.232                           | $t(21) = 1.09$     | 0.289                      | —                        |
| Experiment 1 (deoxyhemoglobin)  |                                 |                    |                            |                          |
| Left superior                   | -0.218                          | $t(18) = -0.95$    | 0.354                      | —                        |
| Left inferior                   | 0.117                           | $t(22) = 0.56$     | 0.582                      | —                        |
| Right superior                  | 0.207                           | $t(21) = 0.97$     | 0.342                      | —                        |
| Right inferior                  | 0.086                           | $t(21) = 0.40$     | 0.692                      | —                        |
| Experiment 2 (oxyhemoglobin)    |                                 |                    |                            |                          |
| Left superior                   | 0.507                           | $t(19) = 2.27$     | 0.035                      | 0.105                    |
| Left inferior                   | 0.599                           | $t(22) = 2.87$     | 0.009                      | 0.036*                   |
| Right superior                  | 0.437                           | $t(17) = 1.85$     | 0.081                      | 0.162                    |
| Right inferior                  | 0.213                           | $t(19) = 0.95$     | 0.352                      | —                        |
| Experiment 2 (deoxyhemoglobin)  |                                 |                    |                            |                          |
| Left superior                   | 0.048                           | $t(19) = 0.21$     | 0.833                      | —                        |
| Left inferior                   | 0.089                           | $t(22) = 0.42$     | 0.675                      | —                        |
| Right superior                  | 0.214                           | $t(17) = 0.91$     | 0.376                      | —                        |
| Right inferior                  | 0.029                           | $t(19) = 0.13$     | 0.900                      | —                        |
| Experiment S1 (oxyhemoglobin)   |                                 |                    |                            |                          |
| Left superior                   | -0.104                          | $t(21) = -0.49$    | 0.632                      | —                        |
| Left inferior                   | 0.165                           | $t(21) = 0.77$     | 0.449                      | —                        |
| Right superior                  | -0.247                          | $t(19) = -1.10$    | 0.283                      | —                        |
| Right inferior                  | -0.230                          | $t(21) = -1.08$    | 0.293                      | —                        |
| Experiment S1 (deoxyhemoglobin) |                                 |                    |                            |                          |
| Left superior                   | -0.453                          | $t(21) = -2.13$    | 0.046                      | 0.184                    |
| Left inferior                   | 0.268                           | $t(21) = 1.26$     | 0.223                      | —                        |
| Right superior                  | -0.196                          | $t(19) = -0.88$    | 0.392                      | —                        |
| Right inferior                  | 0.166                           | $t(21) = 0.78$     | 0.444                      | —                        |

\*Denotes significant differences between conditions at the 5% level after applying the Holm-Bonferroni correction.
